# Supplementary material
Source: publisher figshare collection journal article supplement (https://rs.figshare.com/ndownloader/files/14399276)
Supplement: Supplementary file 1 [file 14399276]

Journal of the Royal Society Interface

Dynamics of a family of cyan fluorescent proteins probed by incoherent neutron scattering

Maksym Golub, Virginia Guillon, Guillaume Gotthard, Dominik Zeller, Nicolas Martinez, Tilo Seydel, Michael M. Koza, Céline Lafaye, Damien Clavel, David von Stetten, Antoine Royant, Judith Peters


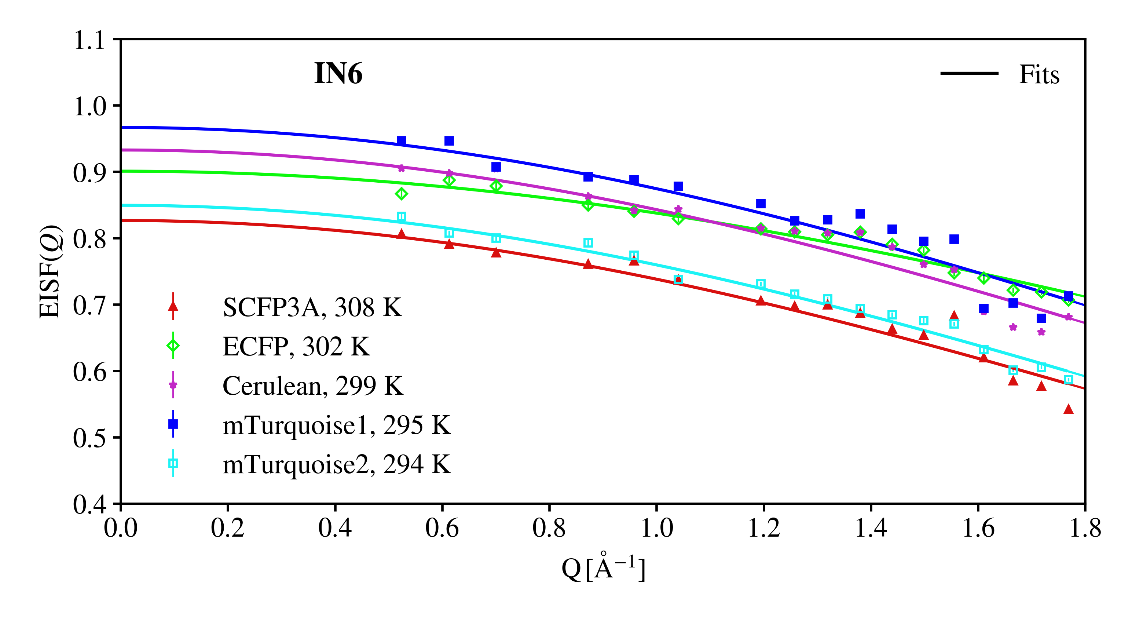


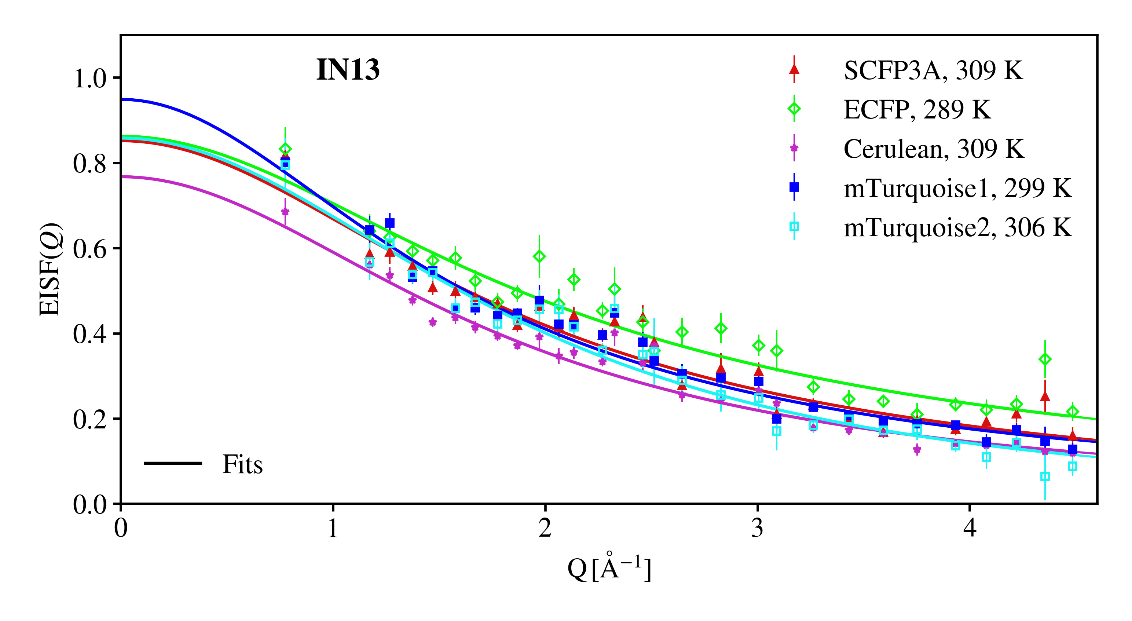


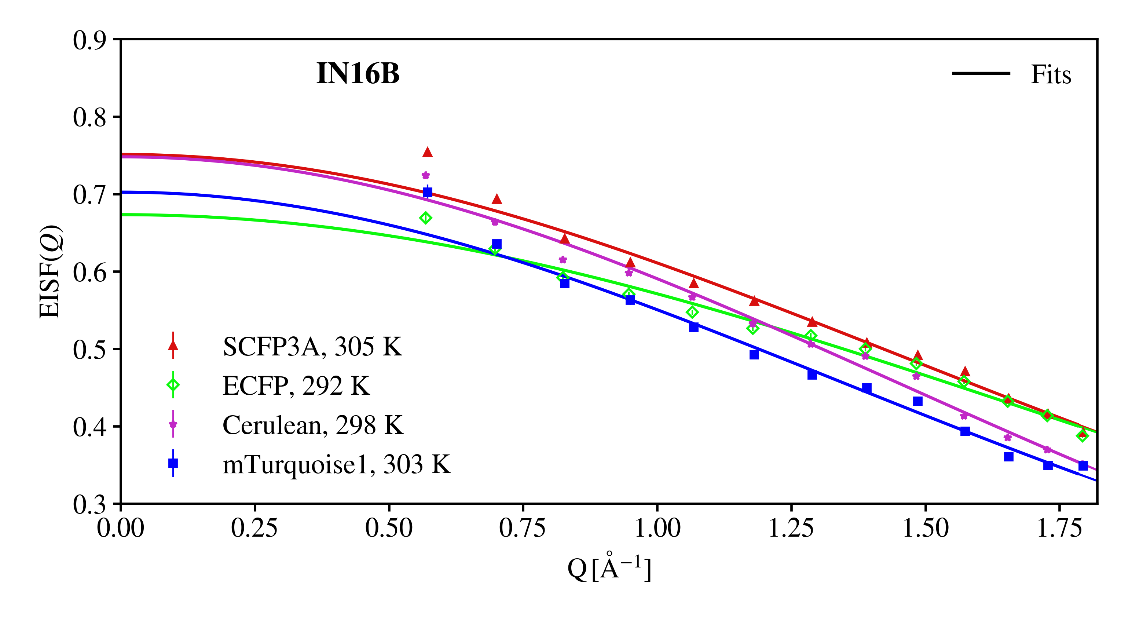


**Fig. S1:** Examples of fits of the structure factor with eq. (3) at 300 K to data obtained on IN6 (Q-range 0.48 – 1.8 Å-1), IN13 (Q-range 0.55 – 4.5 Å-1) and IN16B (Q-range 0.56 – 1.8 Å-1).
